# Supplementary material
Source: PubMed Central journal article supplement (PMC3771302)
Supplement: SD4.pdf [file SD4.pdf]

**SUPPLEMENTAL TABLE 1**  
**Patients considered by the adjudication committee as true visceral leishmaniasis (VL) cases despite negative or not done parasitological exam**

| Patient | Sex, age (years) | CD4 count cell/mm <sup>3</sup> | Previous VL | Fever | Hg (g/dL) | Leukocyte count (cell/L) | Platelet count (cell/L) | Spleen (cm in left midclavicular line) | Therapy used            | rK39 dipstick test | RIFI title | DAT-LPC title | Parasitological exam in bone marrow | qPCR     | Clinical improvement after therapy |
|---------|------------------|--------------------------------|-------------|-------|-----------|--------------------------|-------------------------|----------------------------------------|-------------------------|--------------------|------------|---------------|-------------------------------------|----------|------------------------------------|
| 1       | M, 39            | 35                             | No          | Yes   | 8.1       | 1,600                    | 82,000                  | 2                                      | Pentavalent antimonial  | Neg                | 1:80       | 1:102,400     | Neg                                 | Neg      | Yes                                |
| 2       | F, 28            | 17                             | Yes         | Yes   | 8.6       | 1,600                    | 200,000                 | 2                                      | d-AMP (toxicity), L-AMP | Neg                | Neg        | 1:100         | Neg                                 | Pos      | Yes                                |
| 3       | M, 56            | 9                              | No          | Yes   | 8.7       | 500                      | 83,000                  | 3                                      | d-AMP                   | Neg                | 1:80       | 1:100         | Neg                                 | Neg      | No                                 |
| 4       | F, 34            | 6                              | Yes         | Yes   | 7.6       | 800                      | 172,000                 | 8                                      | d-AMP                   | Pos                | 1:160      | 1:12,800      | Not done                            | Neg      | Abandoned treatment/died           |
| 5       | F, 44            | 129                            | No          | Yes   | 8.8       | 1,900                    | 128,000                 | 6                                      | d-AMP (toxicity), L-AMP | Pos                | 1:40       | 1:12,800      | Not done                            | Not done | Yes                                |
| 6       | M, 36            | 265                            | No          | Yes   | 9.9       | 2,400                    | 213,000                 | 0                                      | d-AMP                   | Neg                | 1:320      | 1:102,410     | Neg                                 | Pos      | Yes                                |

d-AMP = amphotericin B deoxycholate; DAT-LPC = a direct agglutination test using a prototype kit produced at CPqRR; F = female; IFAT = indirect fluorescent antibody test; L-AMP = liposomal amphotericin B; M = male; neg = negative; pos = positive; qPCR = real-time polymerase chain reaction for *Leishmania infantum*; rK39 dipstick test = rapid recombinant K39 antigen-based immunochromatographic test.
